# Supplementary material for: 89Zr-Labeled AR20.5: A MUC1-Targeting ImmunoPET Probe
Source: PubMed Central journal article supplement (PMC7287814; doi:10.3390/molecules25102315), 2020-05-15
Supplement: molecules-25-02315-s001.pdf [file molecules-25-02315-s001.pdf]

## Supplementary Materials

### <sup>89</sup>Zr-Labeled AR20.5: A MUC1-Targeting ImmunoPET Probe

Kimberly Fung<sup>1,2,†</sup>, Delphine Vivier<sup>1,†</sup>, Outi Keinänen<sup>1,3</sup>, Elaheh Khozeimeh Sarbisheh<sup>4</sup>, Eric W. Price<sup>4</sup>, Brian M. Zeglis<sup>1,2,3,5,\*</sup>

<sup>1</sup> Department of Chemistry, Hunter College, City University of New York, New York 10021, NY, U.S.A.

<sup>2</sup> Ph.D. Program in Chemistry, The Graduate Center of the City University of New York, New York, NY 10016, U.S.A.

<sup>3</sup> Department of Radiology, Memorial Sloan Kettering Cancer Center, New York, NY 10021, U.S.A.

<sup>4</sup> Department of Chemistry, University of Saskatchewan, Saskatoon SK S7N 5B5, Canada

<sup>5</sup> Department of Radiology, Weill Cornell Medical College, New York, NY 10021, U.S.A.

\* Correspondence: bz102@hunter.cuny.edu; Tel.: +1-212-896-0443; Fax: +1-212-772-5332

† These two authors contributed equally to this work

## Supplemental Figures

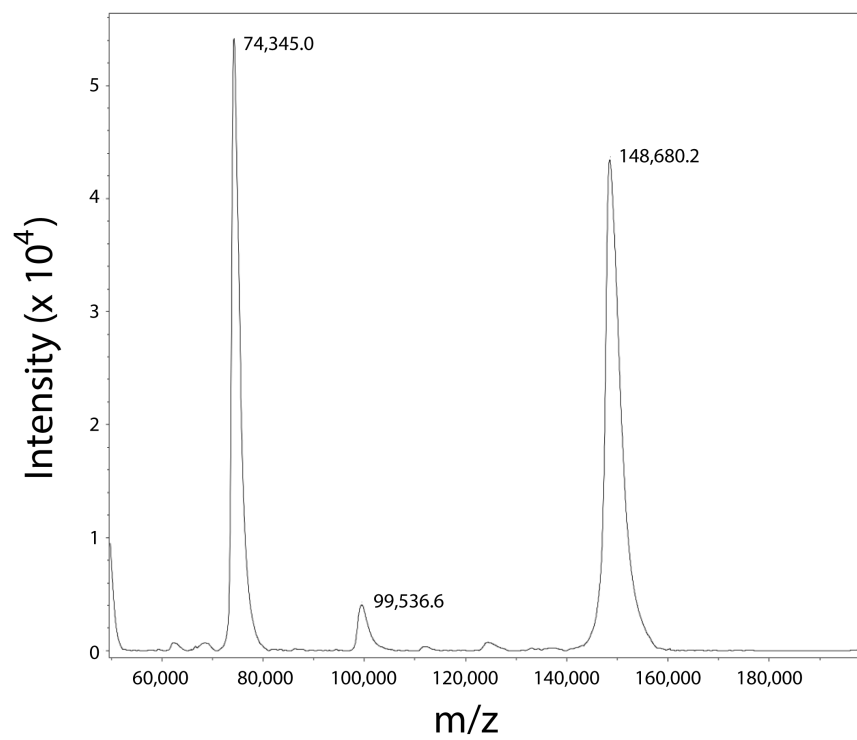

**Figure S1.** Representative MALDI-ToF spectrum for AR20.5.

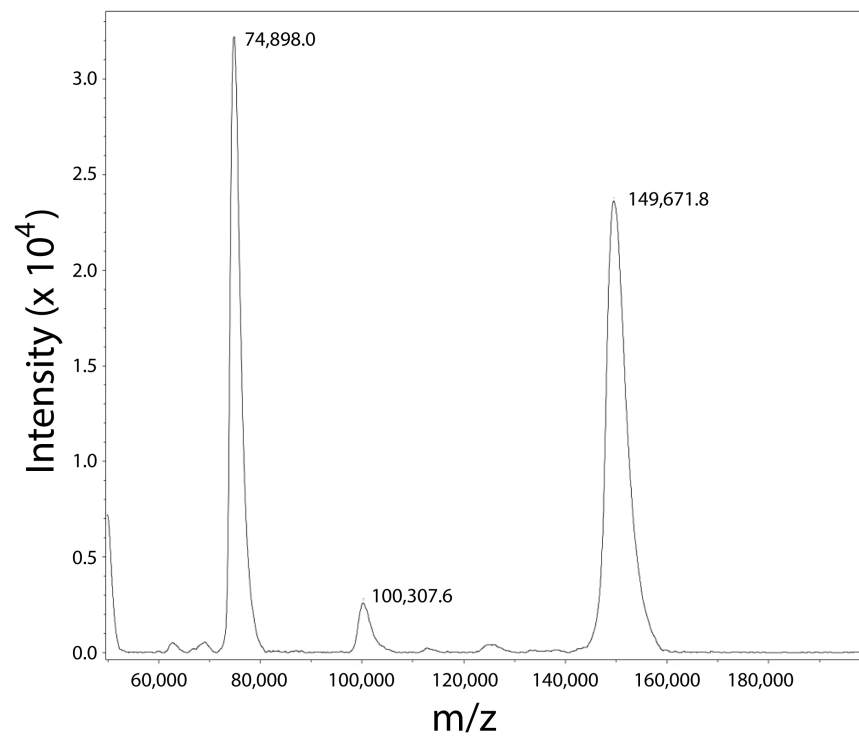

**Figure S2.** Representative MALDI-ToF spectrum for DFO-AR20.5.

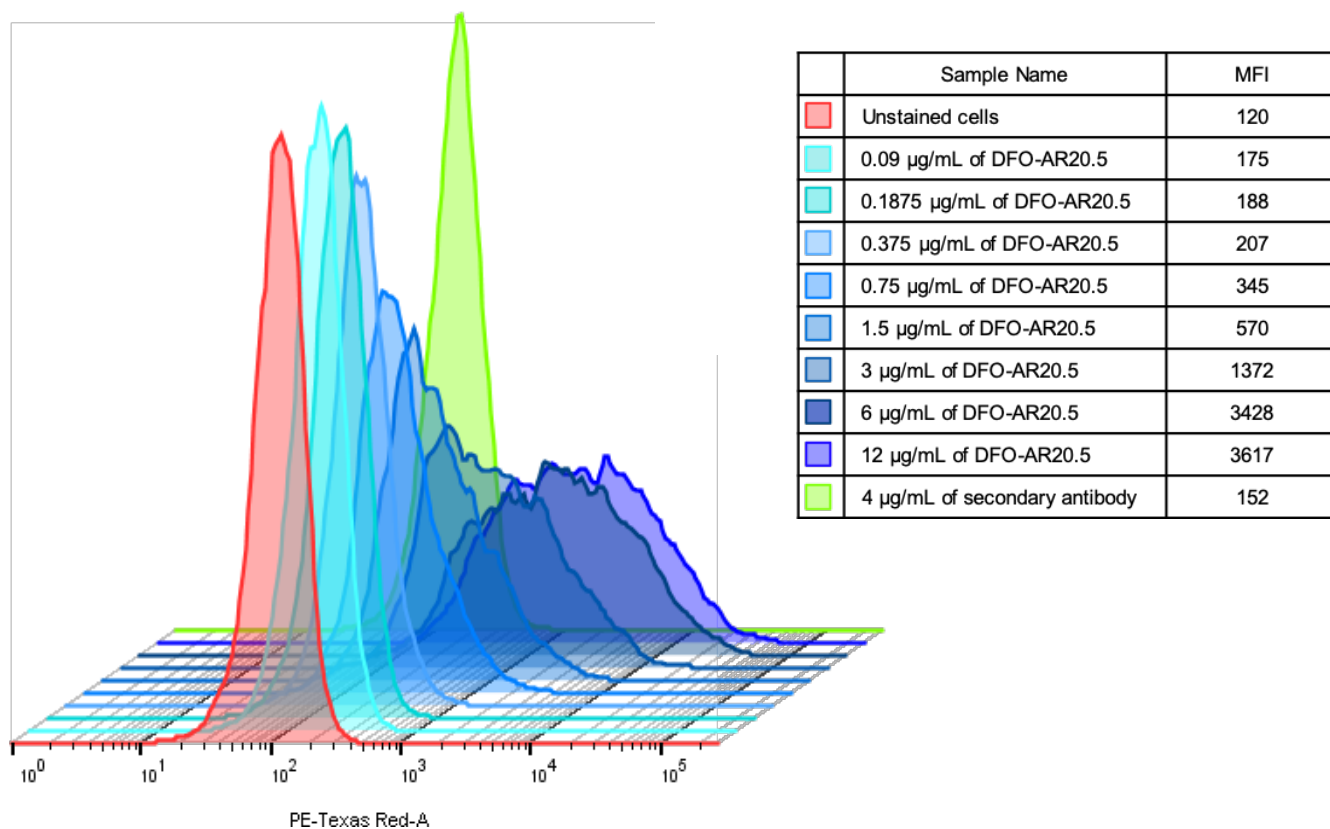

**Figure S3.** Flow cytometry analysis of DFO-AR20.5 with SKOV3 human ovarian cancer cells. MFI = mean fluorescence intensity.

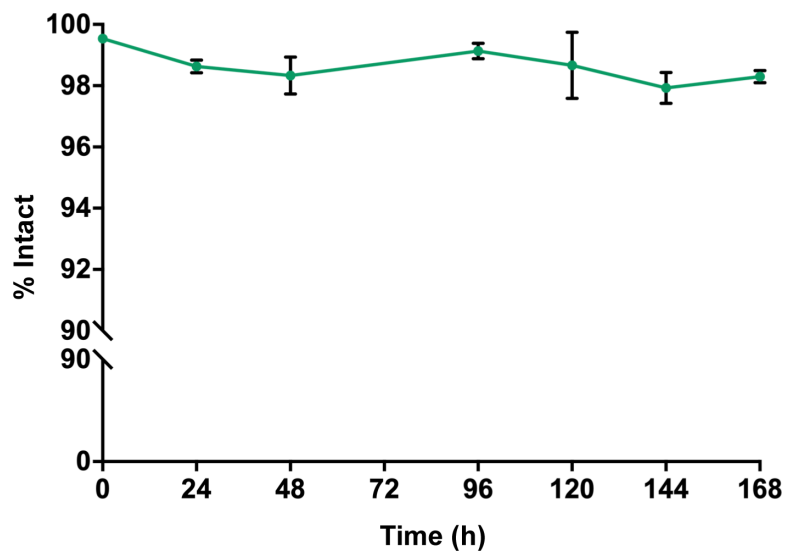

**Figure S4.** The stability of  $[^{89}\text{Zr}]$ Zr-DFO-AR20.5 in human serum at 37 °C. Measurements were collected using radioTLC and were performed in triplicate.

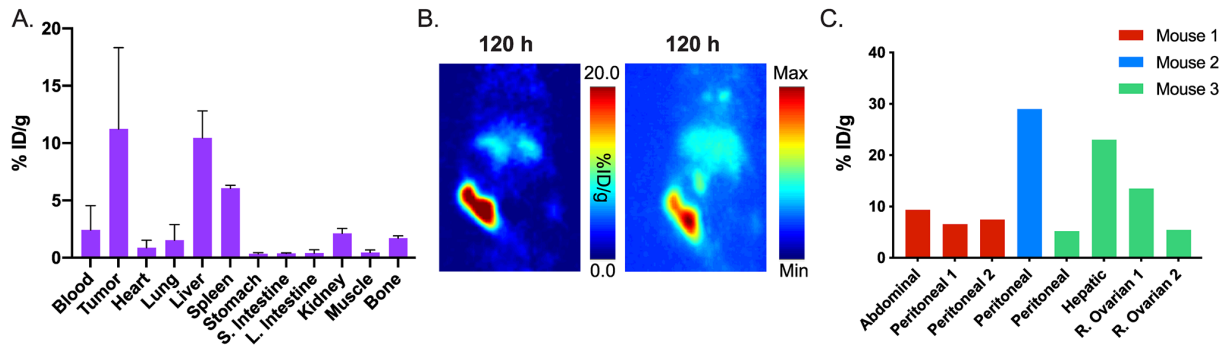

**Figure S5.** (A) Biodistribution data for athymic nude mice ( $n = 3$ ) bearing orthotopic SKOV3-Red-FLuc xenografts collected 120 h following the intravenous tail vein injection of [<sup>89</sup>Zr]Zr-DFO-AR20.5 (5.6 – 6.0 MBq, 150.6 – 161.4  $\mu$ Ci, 59.1 – 63.3  $\mu$ g; in 200  $\mu$ L 0.9% sterile saline); (B) Planar (left) and maximum intensity projection (MIP, right; scaled to a minimum of 0% and a maximum of 100%) PET images of a representative athymic nude mouse — “Mouse 2” — bearing an orthotopic SKOV3-Red-FLuc xenograft collected 120 h post-injection of [<sup>89</sup>Zr]Zr-DFO-AR20.5; (C) Biodistribution data for the metastatic lesions collected from the orthotopic tumor-bearing mice.

## **Supplemental Tables**

**Table S1.** Degree of labeling of DFO-AR20.5 (n = 3) as determined via MALDI-ToF mass spectrometry

| <b>Immunoconjugate</b> | <b>Average mass (Da)</b> | <b>Degree of Labeling (DFO/mAb)</b> |
|------------------------|--------------------------|-------------------------------------|
| AR20.5                 | 148716 ± 49              | N/A                                 |
| DFO-AR20.5             | 149652 ± 53              | 1.2 ± 0.1                           |

**Table S2.** Biodistribution data from athymic nude mice ( $n = 5$  per time point) bearing SKOV3 human ovarian cancer xenografts collected 24, 72, and 120 h after the intravenous administration of [ $^{89}\text{Zr}$ ]Zr-DFO-AR20.5 (0.65 – 0.69 MBq; 17.6 – 18.6  $\mu\text{Ci}$ ; 6.6 – 7.0  $\mu\text{g}$ ). For the 72 h blocking experiment, the mice were administered the same amount of [ $^{89}\text{Zr}$ ]Zr-DFO-AR20.5 mixed with an excess of unmodified AR20.5 (~500  $\mu\text{g}$  per mouse). The values are %ID/g  $\pm$  SD. Stomach, small intestine, and large intestine values include contents.

| <b>Tissue</b>          | <b>24 h</b>    | <b>72 h</b>    | <b>72 h block</b> | <b>120 h</b>    |
|------------------------|----------------|----------------|-------------------|-----------------|
| <i>Blood</i>           | 15.5 $\pm$ 2.9 | 11.9 $\pm$ 2.9 | 9.8 $\pm$ 2.9     | 9.2 $\pm$ 0.6   |
| <i>Tumor</i>           | 11.8 $\pm$ 4.1 | 22.3 $\pm$ 4.6 | 6.9 $\pm$ 2.5     | 33.4 $\pm$ 11.2 |
| <i>Heart</i>           | 4.2 $\pm$ 1.1  | 3.2 $\pm$ 0.7  | 3.0 $\pm$ 0.8     | 2.7 $\pm$ 0.2   |
| <i>Lungs</i>           | 8.3 $\pm$ 1.9  | 5.8 $\pm$ 2.1  | 5.3 $\pm$ 1.9     | 4.6 $\pm$ 0.3   |
| <i>Liver</i>           | 6.5 $\pm$ 1.6  | 6.0 $\pm$ 1.1  | 5.6 $\pm$ 2.3     | 6.2 $\pm$ 1.1   |
| <i>Spleen</i>          | 4.5 $\pm$ 1.0  | 4.7 $\pm$ 1.6  | 3.5 $\pm$ 1.1     | 4.8 $\pm$ 0.7   |
| <i>Stomach</i>         | 1.0 $\pm$ 0.3  | 1.0 $\pm$ 0.3  | 0.8 $\pm$ 0.3     | 0.9 $\pm$ 0.2   |
| <i>Small Intestine</i> | 1.8 $\pm$ 0.2  | 1.4 $\pm$ 0.4  | 1.1 $\pm$ 0.3     | 1.2 $\pm$ 0.2   |
| <i>Large Intestine</i> | 1.2 $\pm$ 0.1  | 0.9 $\pm$ 0.3  | 0.7 $\pm$ 0.2     | 0.8 $\pm$ 0.2   |
| <i>Kidneys</i>         | 6.7 $\pm$ 2.9  | 4.6 $\pm$ 1.1  | 4.9 $\pm$ 1.1     | 4.4 $\pm$ 0.3   |
| <i>Muscle</i>          | 1.3 $\pm$ 0.2  | 0.9 $\pm$ 0.2  | 0.9 $\pm$ 0.3     | 0.8 $\pm$ 0.1   |
| <i>Bone</i>            | 2.4 $\pm$ 0.4  | 3.7 $\pm$ 0.9  | 3.3 $\pm$ 0.7     | 5.0 $\pm$ 1.5   |



**Table S3.** Tumor-to-background activity concentration ratios calculated using the biodistribution data from athymic nude mice ( $n = 5$  per time point) bearing SKOV3 human ovarian cancer xenografts collected 24, 72, and 120 h after the intravenous administration of [ $^{89}\text{Zr}$ ]Zr-DFO-AR20.5 (0.65 – 0.69 MBq; 17.6 – 18.6  $\mu\text{Ci}$ ; 6.6 – 7.0  $\mu\text{g}$ ). For the 72 h blocking experiment, the mice were administered the same amount of [ $^{89}\text{Zr}$ ]Zr-DFO-AR20.5 mixed with an excess of unmodified AR20.5 (~500  $\mu\text{g}$  per mouse). Stomach, small intestine, and large intestine values include contents.

| <b>Tumor-to-</b>       | <b>24 h</b> | <b>72 h</b> | <b>72 h block</b> | <b>120 h</b> |
|------------------------|-------------|-------------|-------------------|--------------|
| <i>Blood</i>           | 0.8 ± 0.3   | 1.9 ± 0.6   | 0.7 ± 0.3         | 3.6 ± 1.2    |
| <i>Heart</i>           | 2.9 ± 1.2   | 7.1 ± 2.2   | 2.3 ± 1.0         | 12.5 ± 4.3   |
| <i>Lungs</i>           | 1.4 ± 0.6   | 3.9 ± 1.6   | 1.3 ± 0.7         | 7.3 ± 2.5    |
| <i>Liver</i>           | 1.8 ± 0.8   | 3.7 ± 1.0   | 1.2 ± 0.7         | 5.4 ± 2.0    |
| <i>Spleen</i>          | 2.7 ± 1.1   | 4.8 ± 1.9   | 2.0 ± 1.0         | 6.9 ± 2.5    |
| <i>Stomach</i>         | 11.5 ± 5.4  | 21.9 ± 8.2  | 8.7 ± 4.4         | 35.7 ± 14.1  |
| <i>Small Intestine</i> | 6.6 ± 2.5   | 15.7 ± 5.2  | 6.4 ± 3.0         | 27.7 ± 9.9   |
| <i>Large Intestine</i> | 10.0 ± 3.6  | 24.8 ± 9.1  | 9.8 ± 4.4         | 43.6 ± 18.3  |
| <i>Kidneys</i>         | 1.8 ± 1.0   | 4.9 ± 1.6   | 1.7 ± 0.8         | 7.5 ± 2.6    |
| <i>Muscle</i>          | 9.3 ± 3.5   | 24.6 ± 8.0  | 7.4 ± 3.5         | 42.7 ± 14.6  |
| <i>Bone</i>            | 4.8 ± 1.8   | 6.1 ± 2.0   | 2.1 ± 0.9         | 6.6 ± 3.0    |

**Table S4.** Biodistribution data from athymic nude mice ( $n = 3$ ) bearing SKOV3-Red-FLuc human ovarian cancer orthotopic xenografts collected 120 h after the intravenous administration of [ $^{89}\text{Zr}$ ]Zr-DFO-AR20.5 (5.6 – 6.0 MBq; 150.6 – 161.4  $\mu\text{Ci}$ ; 59.1 – 63.3  $\mu\text{g}$ ) or [ $^{89}\text{Zr}$ ]Zr-DFO-mIgG (6.1 – 6.4 MBq; 163.7 – 171.7  $\mu\text{Ci}$ ; 61.5 – 70.1  $\mu\text{g}$ ) via the tail vein. The values are %ID/g  $\pm$  SD, and the stomach, small intestine, and large intestine values include contents.

| <b>Tissue</b>          | <b>[<math>^{89}\text{Zr}</math>]Zr-DFO-AR20.5</b> | <b>[<math>^{89}\text{Zr}</math>]Zr-DFO-mIgG</b> |
|------------------------|---------------------------------------------------|-------------------------------------------------|
| <i>Blood</i>           | 2.4 $\pm$ 2.1                                     | 4.2 $\pm$ 1.1                                   |
| <i>Tumor</i>           | 11.3 $\pm$ 7.1                                    | 3.1 $\pm$ 0.8                                   |
| <i>Heart</i>           | 0.9 $\pm$ 0.7                                     | 1.2 $\pm$ 0.2                                   |
| <i>Lungs</i>           | 1.5 $\pm$ 1.4                                     | 1.9 $\pm$ 0.6                                   |
| <i>Liver</i>           | 10.5 $\pm$ 2.4                                    | 5.1 $\pm$ 0.1                                   |
| <i>Spleen</i>          | 6.1 $\pm$ 0.3                                     | 4.5 $\pm$ 1.6                                   |
| <i>Stomach</i>         | 0.3 $\pm$ 0.1                                     | 0.3 $\pm$ 0.1                                   |
| <i>Small Intestine</i> | 0.4 $\pm$ 0.1                                     | 0.5 $\pm$ 0.2                                   |
| <i>Large Intestine</i> | 0.4 $\pm$ 0.3                                     | 0.5 $\pm$ 0.1                                   |
| <i>Kidneys</i>         | 2.1 $\pm$ 0.4                                     | 5.2 $\pm$ 0.5                                   |
| <i>Muscle</i>          | 0.5 $\pm$ 0.2                                     | 0.6 $\pm$ 0.2                                   |
| <i>Bone</i>            | 1.7 $\pm$ 0.2                                     | 1.8 $\pm$ 0.4                                   |

**Table S5.** Tumor-to-organ activity concentration ratios derived from the biodistribution data from athymic nude mice ( $n = 3$ ) bearing SKOV3-Red-FLuc human ovarian cancer orthotopic xenografts collected 120 h after the intravenous administration of [ $^{89}\text{Zr}$ ]Zr-DFO-AR20.5 (5.6 – 6.0 MBq; 150.6 – 161.4  $\mu\text{Ci}$ ; 59.1 – 63.3  $\mu\text{g}$ ) or [ $^{89}\text{Zr}$ ]Zr-DFO-mIgG (6.1 – 6.4 MBq; 163.7 – 171.7  $\mu\text{Ci}$ ; 61.5 – 70.1  $\mu\text{g}$ ) via the tail vein. The stomach, small intestine, and large intestine values include contents.

| <b>Tumor to-</b>       | <b>[<math>^{89}\text{Zr}</math>]Zr-DFO-AR20.5</b> | <b>[<math>^{89}\text{Zr}</math>]Zr-DFO-mIgG</b> |
|------------------------|---------------------------------------------------|-------------------------------------------------|
| <i>Blood</i>           | 4.6 $\pm$ 4.9                                     | 0.7 $\pm$ 0.3                                   |
| <i>Heart</i>           | 12.9 $\pm$ 12.6                                   | 2.5 $\pm$ 0.8                                   |
| <i>Lungs</i>           | 7.4 $\pm$ 8.0                                     | 1.6 $\pm$ 0.6                                   |
| <i>Liver</i>           | 1.1 $\pm$ 0.7                                     | 0.6 $\pm$ 0.2                                   |
| <i>Spleen</i>          | 1.9 $\pm$ 1.2                                     | 0.7 $\pm$ 0.3                                   |
| <i>Stomach</i>         | 33.2 $\pm$ 23.5                                   | 11.9 $\pm$ 5.1                                  |
| <i>Small Intestine</i> | 30.4 $\pm$ 19.7                                   | 6.5 $\pm$ 2.8                                   |
| <i>Large Intestine</i> | 27.5 $\pm$ 25.9                                   | 6.8 $\pm$ 2.4                                   |
| <i>Kidneys</i>         | 5.3 $\pm$ 3.5                                     | 0.6 $\pm$ 0.2                                   |
| <i>Muscle</i>          | 24.6 $\pm$ 19.3                                   | 5.1 $\pm$ 2.2                                   |
| <i>Bone</i>            | 6.6 $\pm$ 4.2                                     | 1.8 $\pm$ 0.6                                   |

**Table S6.** Biodistribution data for the metastatic lesions collected from athymic nude mice ( $n = 3$ ) bearing SKOV3-Red-FLuc human ovarian cancer orthotopic xenografts 120 h after the intravenous administration of [ $^{89}\text{Zr}$ ]Zr-DFO-AR20.5 (5.6 – 6.0 MBq; 150.6 – 161.4  $\mu\text{Ci}$ ; 59.1 – 63.3  $\mu\text{g}$ ) via the tail vein. The values are %ID/g.

| <b>Mouse</b>   | <b>Metastatic Lesions</b> | <b>[<math>^{89}\text{Zr}</math>]Zr-DFO-AR20.5</b> |
|----------------|---------------------------|---------------------------------------------------|
| <i>Mouse 1</i> | <i>Abdominal</i>          | 9.3                                               |
|                | <i>Peritoneal 1</i>       | 6.5                                               |
|                | <i>Peritoneal 2</i>       | 7.4                                               |
| <i>Mouse 2</i> | <i>Peritoneal</i>         | 29.0                                              |
| <i>Mouse 3</i> | <i>Peritoneal</i>         | 5.2                                               |
|                | <i>Hepatic</i>            | 23.0                                              |
|                | <i>Right Ovarian 1</i>    | 13.5                                              |
|                | <i>Right Ovarian 2</i>    | 5.5                                               |
